# Supplementary material for: Long intergenic non-protein coding RNA 00858 functions as a competing endogenous RNA for miR-422a to facilitate the cell growth in non-small cell lung cancer
Source: PubMed Central journal article supplement (PMC5361675; doi:10.18632/aging.101171), 2017-02-06
Supplement: aging-09-475-s001.pdf [file aging-09-475-s001.pdf]

## SUPPLEMENTARY MATERIAL

**Supplementary Table S1. Predicted results using miRDB (target score $\geq$ 50)**

| Target Detail | Target Rank | Target Score | miRNA Name      | Gene Symbol |
|---------------|-------------|--------------|-----------------|-------------|
|               | 1           | 81           | hsa-miR-3182    | submission  |
|               | 2           | 78           | hsa-miR-4419a   | submission  |
|               | 3           | 68           | hsa-miR-6513-3p | submission  |
|               | 4           | 67           | hsa-miR-4753-3p | submission  |
|               | 5           | 66           | hsa-miR-4291    | submission  |
|               | 6           | 63           | hsa-miR-6819-5p | submission  |
|               | 7           | 63           | hsa-miR-4633-3p | submission  |
|               | 8           | 60           | hsa-miR-1227-5p | submission  |
|               | 9           | 59           | hsa-miR-6124    | submission  |
|               | 10          | 57           | hsa-miR-7973    | submission  |
|               | 11          | 56           | hsa-miR-6842-3p | submission  |
|               | 12          | 55           | hsa-miR-6756-3p | submission  |
|               | 13          | 55           | hsa-miR-3127-3p | submission  |
|               | 14          | 55           | hsa-miR-4769-5p | submission  |
|               | 15          | 55           | hsa-miR-4654    | submission  |
|               | 16          | 55           | hsa-miR-4516    | submission  |
|               | 17          | 55           | hsa-miR-4434    | submission  |
|               | 18          | 53           | hsa-miR-6818-3p | submission  |
|               | 19          | 53           | hsa-miR-6872-3p | submission  |
|               | 20          | 52           | hsa-miR-6882-3p | submission  |
|               | 21          | 52           | hsa-miR-153-3p  | submission  |
|               | 22          | 52           | hsa-miR-6809-3p | submission  |
|               | 23          | 51           | hsa-miR-4778-3p | submission  |
|               | 24          | 51           | hsa-miR-6776-3p | submission  |
|               | 25          | 51           | hsa-miR-653-5p  | submission  |
|               | 26          | 50           | hsa-miR-6736-3p | submission  |
|               | 27          | 50           | hsa-miR-6844    | submission  |
|               | 28          | 50           | hsa-miR-422a    | submission  |
|               | 29          | 50           | hsa-miR-378i    | submission  |
|               | 30          | 50           | hsa-miR-378h    | submission  |
|               | 31          | 50           | hsa-miR-378f    | submission  |
|               | 32          | 50           | hsa-miR-378e    | submission  |
|               | 33          | 50           | hsa-miR-378d    | submission  |
|               | 34          | 50           | hsa-miR-378c    | submission  |
|               | 35          | 50           | hsa-miR-378b    | submission  |
|               | 36          | 50           | hsa-miR-378a-3p | submission  |
|               | 37          | 50           | hsa-miR-3152-3p | submission  |

**Supplementary Table S2. Predicted results using PITA (target score $\leq$ -10 kcal/mol) - Supplementary File 1**

**Supplementary Table S3. Top 100 potential targets of miR-422a - Supplementary File 2**
