# Supplementary material for: Long intergenic non-protein coding RNA 00858 functions as a competing endogenous RNA for miR-422a to facilitate the cell growth in non-small cell lung cancer
Source: publisher site journal article supplement (doi:10.18632/aging.101171), 2017-02-06
Supplement: Supplementary file 1 [file aging-v9i2-101171-supplementary-material-SD2.xlsx]

## Sheet: tmp_results_92e74fcfe41795d7f5b
Table S2. Predicted results using PITA (target score≤-10 kcal/mol)
Gene	microRNA	Sites	Score
Seq1	hsa-miR-1207-5p	6	-29.95
Seq1	hsa-miR-637	10	-22.97
Seq1	hsa-miR-612	9	-22.2
Seq1	hsa-miR-663	4	-21.65
Seq1	hsa-miR-671-5p	3	-21.33
Seq1	hsa-miR-1268	6	-21
Seq1	hsa-miR-939	10	-20.54
Seq1	hsa-miR-1225-5p	4	-20.48
Seq1	hsa-miR-125a-3p	14	-19.24
Seq1	hsa-miR-423-5p	7	-18.84
Seq1	hsa-miR-1293	6	-18.74
Seq1	hsa-miR-663b	4	-18.23
Seq1	hsa-miR-608	4	-17.92
Seq1	hsa-miR-658	3	-17.9
Seq1	hsa-miR-519b-3p	8	-17.56
Seq1	hsa-miR-920	8	-17.4
Seq1	hsa-miR-1295	4	-17.31
Seq1	hsa-miR-571	8	-17.15
Seq1	hsa-miR-517b	3	-16.64
Seq1	hsa-miR-654-5p	7	-16.34
Seq1	hsa-miR-541	8	-16.29
Seq1	hsa-miR-184	5	-16.09
Seq1	hsa-miR-760	10	-15.95
Seq1	hsa-miR-1299	5	-15.53
Seq1	hsa-miR-193a-5p	7	-15.43
Seq1	hsa-miR-1275	9	-15.42
Seq1	hsa-miR-519c-3p	8	-15.36
Seq1	hsa-miR-339-3p	5	-15.24
Seq1	hsa-miR-122	9	-14.96
Seq1	hsa-miR-665	7	-14.94
Seq1	hsa-miR-296-3p	12	-14.92
Seq1	hsa-miR-661	7	-14.87
Seq1	hsa-miR-1250	6	-14.79
Seq1	hsa-miR-650	8	-14.66
Seq1	hsa-miR-1288	3	-14.63
Seq1	hsa-miR-638	3	-14.57
Seq1	hsa-miR-486-3p	10	-14.55
Seq1	hsa-miR-933	3	-14.55
Seq1	hsa-miR-623	4	-14.53
Seq1	hsa-miR-1204	2	-14.5
Seq1	hsa-miR-1296	4	-14.48
Seq1	hsa-miR-24	7	-14.47
Seq1	hsa-miR-1266	7	-14.4
Seq1	hsa-miR-596	4	-14.32
Seq1	hsa-miR-885-3p	4	-14.18
Seq1	hsa-miR-1183	5	-14.11
Seq1	hsa-miR-299-3p	6	-14.11
Seq1	hsa-miR-892b	3	-14.11
Seq1	hsa-miR-1182	7	-14.03
Seq1	hsa-miR-140-3p	7	-14
Seq1	hsa-miR-210	2	-13.95
Seq1	hsa-miR-557	3	-13.82
Seq1	hsa-miR-765	7	-13.69
Seq1	hsa-miR-1202	5	-13.67
Seq1	hsa-miR-134	8	-13.61
Seq1	hsa-miR-509-3p	7	-13.49
Seq1	hsa-miR-877	7	-13.48
Seq1	hsa-miR-769-3p	9	-13.42
Seq1	hsa-miR-519a	8	-13.36
Seq1	hsa-miR-198	5	-13.33
Seq1	hsa-miR-940	9	-13.27
Seq1	hsa-miR-1292	4	-13.26
Seq1	hsa-miR-1300	7	-13.25
Seq1	hsa-miR-206	5	-13.2
Seq1	hsa-miR-552	8	-13.17
Seq1	hsa-miR-602	3	-13.12
Seq1	hsa-miR-641	7	-13.09
Seq1	hsa-miR-103	8	-13.04
Seq1	hsa-miR-1180	4	-13
Seq1	hsa-miR-216a	5	-12.98
Seq1	hsa-miR-107	8	-12.96
Seq1	hsa-miR-138	11	-12.92
Seq1	hsa-miR-510	8	-12.92
Seq1	hsa-miR-593	5	-12.91
Seq1	hsa-miR-193a-3p	8	-12.85
Seq1	hsa-miR-199a-3p	6	-12.8
Seq1	hsa-miR-199b-3p	6	-12.8
Seq1	hsa-miR-1255b	5	-12.75
Seq1	hsa-miR-326	6	-12.75
Seq1	hsa-miR-373	9	-12.72
Seq1	hsa-miR-622	3	-12.64
Seq1	hsa-miR-659	10	-12.62
Seq1	hsa-miR-520d-3p	9	-12.46
Seq1	hsa-miR-921	7	-12.46
Seq1	hsa-miR-214	13	-12.43
Seq1	hsa-miR-320a	8	-12.41
Seq1	hsa-miR-330-5p	6	-12.41
Seq1	hsa-miR-320b	8	-12.39
Seq1	hsa-miR-675	5	-12.36
Seq1	hsa-miR-1224-3p	1	-12.3
Seq1	hsa-miR-768-5p	6	-12.28
Seq1	hsa-miR-488	3	-12.26
Seq1	hsa-miR-566	3	-12.23
Seq1	hsa-miR-615-5p	6	-12.18
Seq1	hsa-miR-1224-5p	9	-12.16
Seq1	hsa-miR-520e	9	-12.15
Seq1	hsa-miR-453	4	-12.08
Seq1	hsa-miR-550	4	-12.07
Seq1	hsa-miR-625	9	-11.92
Seq1	hsa-miR-485-5p	15	-11.87
Seq1	hsa-miR-1255a	5	-11.8
Seq1	hsa-miR-323-5p	3	-11.76
Seq1	hsa-miR-644	10	-11.67
Seq1	hsa-miR-610	3	-11.66
Seq1	hsa-miR-298	4	-11.65
Seq1	hsa-miR-646	9	-11.58
Seq1	hsa-miR-1205	11	-11.52
Seq1	hsa-miR-520c-3p	9	-11.49
Seq1	hsa-miR-601	3	-11.45
Seq1	hsa-miR-942	12	-11.45
Seq1	hsa-miR-370	7	-11.39
Seq1	hsa-miR-640	6	-11.36
Seq1	hsa-miR-708	10	-11.32
Seq1	hsa-miR-1229	3	-11.28
Seq1	hsa-miR-325	9	-11.26
Seq1	hsa-miR-205	5	-11.2
Seq1	hsa-miR-422a	4	-11.2
Seq1	hsa-miR-433	6	-11.18
Seq1	hsa-miR-943	3	-11.1
Seq1	hsa-miR-1259	4	-11.09
Seq1	hsa-miR-1270	4	-11.05
Seq1	hsa-miR-19b	5	-11.01
Seq1	hsa-miR-431	6	-11.01
Seq1	hsa-miR-1231	11	-10.99
Seq1	hsa-miR-378	4	-10.98
Seq1	hsa-miR-1234	4	-10.96
Seq1	hsa-miR-484	7	-10.93
Seq1	hsa-miR-508-5p	2	-10.89
Seq1	hsa-miR-147	9	-10.87
Seq1	hsa-miR-519b-5p	6	-10.87
Seq1	hsa-miR-519c-5p	6	-10.87
Seq1	hsa-miR-874	4	-10.86
Seq1	hsa-miR-720	5	-10.84
Seq1	hsa-miR-220c	8	-10.83
Seq1	hsa-miR-941	2	-10.78
Seq1	hsa-miR-491-5p	7	-10.75
Seq1	hsa-miR-493	5	-10.7
Seq1	hsa-miR-20b	8	-10.65
Seq1	hsa-miR-342-5p	6	-10.63
Seq1	hsa-miR-512-3p	7	-10.62
Seq1	hsa-miR-181a	4	-10.58
Seq1	hsa-miR-211	6	-10.54
Seq1	hsa-miR-502-5p	6	-10.53
Seq1	hsa-miR-1291	6	-10.5
Seq1	hsa-miR-520a-3p	9	-10.5
Seq1	hsa-miR-1272	6	-10.49
Seq1	hsa-miR-613	9	-10.49
Seq1	hsa-miR-105	6	-10.48
Seq1	hsa-miR-135a	9	-10.46
Seq1	hsa-miR-1197	8	-10.44
Seq1	hsa-miR-770-5p	4	-10.41
Seq1	hsa-miR-520b	9	-10.4
Seq1	hsa-miR-450b-3p	4	-10.37
Seq1	hsa-miR-513a-5p	11	-10.28
Seq1	hsa-miR-188-5p	4	-10.27
Seq1	hsa-miR-555	7	-10.26
Seq1	hsa-miR-202	1	-10.16
Seq1	hsa-miR-660	6	-10.12
Seq1	hsa-miR-936	8	-10.11
Seq1	hsa-miR-193b	5	-10.1
Seq1	hsa-miR-508-3p	6	-10.1
Seq1	hsa-miR-1208	10	-10.08
Seq1	hsa-miR-185	4	-10.08
Seq1	hsa-miR-219-1-3p	8	-10.06
Seq1	hsa-miR-524-3p	3	-10.06
Seq1	hsa-miR-532-5p	6	-10.06
Seq1	hsa-miR-146b-3p	3	-10.04
Seq1	hsa-miR-320c	8	-10.04
Seq1	hsa-miR-589	9	-10.03
Seq1	hsa-miR-106b	8	-10.01
Seq1	hsa-miR-1308	7	-9.98
Seq1	hsa-miR-146a	5	-9.98
Seq1	hsa-miR-615-3p	6	-9.98
Seq1	hsa-miR-151-5p	4	-9.97
Seq1	hsa-miR-19a	5	-9.94
Seq1	hsa-miR-301b	4	-9.89
Seq1	hsa-miR-432	9	-9.87
Seq1	hsa-miR-584	5	-9.76
Seq1	hsa-miR-657	9	-9.76
Seq1	hsa-miR-1263	3	-9.68
Seq1	hsa-miR-515-3p	8	-9.68
Seq1	hsa-miR-204	6	-9.57
Seq1	hsa-miR-648	7	-9.54
Seq1	hsa-miR-1258	7	-9.5
Seq1	hsa-miR-203	6	-9.49
Seq1	hsa-miR-28-5p	7	-9.48
Seq1	hsa-miR-130a	4	-9.47
Seq1	hsa-miR-503	2	-9.47
Seq1	hsa-miR-525-3p	3	-9.46
Seq1	hsa-miR-448	6	-9.44
Seq1	hsa-miR-654-3p	4	-9.43
Seq1	hsa-miR-574-5p	6	-9.42
Seq1	hsa-miR-575	4	-9.37
Seq1	hsa-miR-106a	8	-9.36
Seq1	hsa-miR-17	8	-9.36
Seq1	hsa-miR-1238	4	-9.35
Seq1	hsa-miR-324-3p	1	-9.35
Seq1	hsa-miR-1301	6	-9.33
Seq1	hsa-miR-1257	5	-9.28
Seq1	hsa-miR-153	5	-9.26
Seq1	hsa-miR-629	3	-9.24
Seq1	hsa-miR-383	3	-9.23
Seq1	hsa-miR-93	8	-9.23
Seq1	hsa-miR-1246	8	-9.21
Seq1	hsa-miR-1244	8	-9.2
Seq1	hsa-miR-502-3p	1	-9.2
Seq1	hsa-miR-23a	5	-9.19
Seq1	hsa-miR-23b	5	-9.19
Seq1	hsa-miR-412	3	-9.18
Seq1	hsa-miR-1254	2	-9.17
Seq1	hsa-miR-7	10	-9.17
Seq1	hsa-miR-619	3	-9.16
Seq1	hsa-miR-520f	9	-9.15
Seq1	hsa-miR-664	12	-9.15
Seq1	hsa-miR-135b	9	-9.14
Seq1	hsa-miR-744	4	-9.11
Seq1	hsa-miR-548m	5	-9.02
Seq1	hsa-miR-183	5	-8.99
Seq1	hsa-miR-498	6	-8.99
Seq1	hsa-miR-10a	2	-8.97
Seq1	hsa-miR-450b-5p	8	-8.97
Seq1	hsa-miR-600	7	-8.97
Seq1	hsa-miR-26b	4	-8.95
Seq1	hsa-miR-340	6	-8.93
Seq1	hsa-miR-182	5	-8.92
Seq1	hsa-miR-425	2	-8.91
Seq1	hsa-miR-526b	12	-8.89
Seq1	hsa-miR-542-5p	3	-8.86
Seq1	hsa-miR-506	6	-8.85
Seq1	hsa-miR-542-3p	9	-8.85
Seq1	hsa-miR-490-3p	3	-8.82
Seq1	hsa-miR-591	7	-8.82
Seq1	hsa-miR-1304	10	-8.79
Seq1	hsa-miR-221	7	-8.78
Seq1	hsa-miR-604	6	-8.78
Seq1	hsa-miR-1294	4	-8.76
Seq1	hsa-miR-20a	8	-8.72
Seq1	hsa-miR-934	1	-8.67
Seq1	hsa-miR-1265	5	-8.64
Seq1	hsa-miR-409-5p	3	-8.64
Seq1	hsa-miR-507	2	-8.64
Seq1	hsa-miR-302c	9	-8.63
Seq1	hsa-miR-515-5p	6	-8.57
Seq1	hsa-miR-923	5	-8.56
Seq1	hsa-miR-1274a	5	-8.55
Seq1	hsa-miR-372	11	-8.53
Seq1	hsa-miR-1273	6	-8.5
Seq1	hsa-miR-1200	3	-8.49
Seq1	hsa-miR-130b	4	-8.49
Seq1	hsa-miR-31	7	-8.49
Seq1	hsa-miR-409-3p	4	-8.47
Seq1	hsa-miR-1289	9	-8.42
Seq1	hsa-miR-766	3	-8.41
Seq1	hsa-miR-518d-5p	6	-8.39
Seq1	hsa-miR-520c-5p	6	-8.39
Seq1	hsa-miR-526a	6	-8.39
Seq1	hsa-miR-554	2	-8.38
Seq1	hsa-miR-26a	4	-8.35
Seq1	hsa-miR-1233	7	-8.33
Seq1	hsa-miR-671-3p	6	-8.33
Seq1	hsa-miR-501-5p	5	-8.31
Seq1	hsa-miR-302d	9	-8.26
Seq1	hsa-miR-525-5p	8	-8.26
Seq1	hsa-miR-516b	7	-8.24
Seq1	hsa-miR-379	6	-8.21
Seq1	hsa-miR-200c	6	-8.2
Seq1	hsa-miR-523	1	-8.2
Seq1	hsa-miR-1203	4	-8.16
Seq1	hsa-miR-1225-3p	3	-8.16
Seq1	hsa-miR-518a-3p	7	-8.16
Seq1	hsa-miR-517a	3	-8.13
Seq1	hsa-miR-297	4	-8.11
Seq1	hsa-miR-382	8	-8.09
Seq1	hsa-miR-186	4	-8.08
Seq1	hsa-miR-136	9	-8.06
Seq1	hsa-miR-371-5p	3	-8.04
Seq1	hsa-miR-29a	2	-8.02
Seq1	hsa-miR-595	5	-8.01
Seq1	hsa-miR-149	4	-7.99
Seq1	hsa-miR-455-3p	6	-7.96
Seq1	hsa-miR-758	4	-7.92
Seq1	hsa-miR-876-5p	9	-7.91
Seq1	hsa-miR-154	5	-7.9
Seq1	hsa-miR-1303	10	-7.88
Seq1	hsa-miR-320d	8	-7.85
Seq1	hsa-miR-199a-5p	11	-7.84
Seq1	hsa-let-7d	3	-7.82
Seq1	hsa-miR-632	8	-7.8
Seq1	hsa-miR-1248	4	-7.79
Seq1	hsa-miR-143	6	-7.79
Seq1	hsa-miR-181c	4	-7.78
Seq1	hsa-miR-450a	3	-7.77
Seq1	hsa-miR-886-5p	1	-7.76
Seq1	hsa-miR-1284	2	-7.74
Seq1	hsa-miR-532-3p	3	-7.73
Seq1	hsa-miR-519e	5	-7.71
Seq1	hsa-miR-490-5p	3	-7.7
Seq1	hsa-miR-92a	4	-7.7
Seq1	hsa-miR-922	6	-7.68
Seq1	hsa-miR-328	3	-7.65
Seq1	hsa-miR-199b-5p	11	-7.61
Seq1	hsa-miR-10b	2	-7.57
Seq1	hsa-miR-1267	7	-7.55
Seq1	hsa-miR-375	3	-7.55
Seq1	hsa-miR-301a	4	-7.53
Seq1	hsa-miR-642	5	-7.52
Seq1	hsa-miR-570	8	-7.5
Seq1	hsa-miR-1201	3	-7.48
Seq1	hsa-miR-376b	6	-7.48
Seq1	hsa-miR-132	4	-7.47
Seq1	hsa-miR-516a-3p	10	-7.46
Seq1	hsa-miR-18a	5	-7.45
Seq1	hsa-miR-27a	8	-7.45
Seq1	hsa-miR-28-3p	8	-7.45
Seq1	hsa-miR-511	16	-7.45
Seq1	hsa-miR-27b	8	-7.4
Seq1	hsa-miR-95	4	-7.35
Seq1	hsa-miR-331-3p	4	-7.34
Seq1	hsa-miR-302a	9	-7.32
Seq1	hsa-miR-551b	2	-7.32
Seq1	hsa-miR-148b	4	-7.31
Seq1	hsa-miR-504	6	-7.31
Seq1	hsa-miR-597	3	-7.27
Seq1	hsa-miR-330-3p	3	-7.26
Seq1	hsa-miR-549	5	-7.25
Seq1	hsa-let-7a	3	-7.22
Seq1	hsa-miR-124	4	-7.22
Seq1	hsa-miR-647	7	-7.22
Seq1	hsa-let-7b	3	-7.2
Seq1	hsa-miR-521	1	-7.18
Seq1	hsa-miR-1184	6	-7.17
Seq1	hsa-miR-497	3	-7.16
Seq1	hsa-miR-509-3-5p	6	-7.15
Seq1	hsa-miR-125a-5p	3	-7.07
Seq1	hsa-miR-618	2	-7.06
Seq1	hsa-miR-25	4	-7.05
Seq1	hsa-miR-1251	2	-7.02
Seq1	hsa-miR-769-5p	3	-7
Seq1	hsa-miR-518d-3p	7	-6.99
Seq1	hsa-miR-875-5p	5	-6.97
Seq1	hsa-let-7g	3	-6.96
Seq1	hsa-miR-192	6	-6.94
Seq1	hsa-miR-424	8	-6.93
Seq1	hsa-miR-892a	4	-6.93
Seq1	hsa-miR-215	6	-6.9
Seq1	hsa-miR-1269	3	-6.88
Seq1	hsa-miR-411	3	-6.87
Seq1	hsa-miR-1290	6	-6.86
Seq1	hsa-miR-487a	5	-6.85
Seq1	hsa-miR-151-3p	7	-6.84
Seq1	hsa-miR-522	5	-6.81
Seq1	hsa-let-7c	3	-6.79
Seq1	hsa-miR-1	5	-6.79
Seq1	hsa-miR-1252	8	-6.78
Seq1	hsa-miR-421	6	-6.77
Seq1	hsa-miR-454	4	-6.75
Seq1	hsa-miR-500	3	-6.74
Seq1	hsa-miR-492	2	-6.73
Seq1	hsa-miR-520a-5p	8	-6.73
Seq1	hsa-miR-630	5	-6.72
Seq1	hsa-miR-33b	5	-6.71
Seq1	hsa-miR-1278	6	-6.7
Seq1	hsa-miR-574-3p	1	-6.68
Seq1	hsa-miR-1274b	4	-6.67
Seq1	hsa-miR-18b	5	-6.66
Seq1	hsa-miR-1245	5	-6.65
Seq1	hsa-miR-628-3p	11	-6.62
Seq1	hsa-miR-1322	7	-6.59
Seq1	hsa-miR-616	2	-6.55
Seq1	hsa-miR-509-5p	6	-6.54
Seq1	hsa-miR-15a	3	-6.5
Seq1	hsa-miR-302b	9	-6.5
Seq1	hsa-miR-145	5	-6.47
Seq1	hsa-miR-1276	7	-6.46
Seq1	hsa-miR-1262	8	-6.43
Seq1	hsa-miR-29b	2	-6.42
Seq1	hsa-miR-626	11	-6.39
Seq1	hsa-miR-558	11	-6.38
Seq1	hsa-miR-564	3	-6.34
Seq1	hsa-miR-29c	2	-6.32
Seq1	hsa-miR-636	2	-6.29
Seq1	hsa-miR-581	4	-6.26
Seq1	hsa-miR-345	4	-6.25
Seq1	hsa-miR-92b	4	-6.21
Seq1	hsa-miR-133a	1	-6.2
Seq1	hsa-miR-133b	1	-6.2
Seq1	hsa-miR-33a	5	-6.2
Seq1	hsa-miR-635	5	-6.15
Seq1	hsa-miR-548k	10	-6.13
Seq1	hsa-miR-548l	5	-6.12
Seq1	hsa-miR-9	7	-6.06
Seq1	hsa-miR-1253	3	-6.04
Seq1	hsa-miR-539	7	-6.03
Seq1	hsa-miR-146b-5p	5	-6.01
Seq1	hsa-miR-634	2	-6.01
Seq1	hsa-miR-1271	5	-5.99
Seq1	hsa-miR-1261	10	-5.94
Seq1	hsa-miR-142-3p	4	-5.94
Seq1	hsa-miR-101	8	-5.92
Seq1	hsa-miR-1305	11	-5.9
Seq1	hsa-miR-583	5	-5.86
Seq1	hsa-miR-639	1	-5.86
Seq1	hsa-miR-1207-3p	6	-5.84
Seq1	hsa-miR-1236	5	-5.67
Seq1	hsa-miR-22	5	-5.65
Seq1	hsa-miR-551a	3	-5.62
Seq1	hsa-miR-924	7	-5.62
Seq1	hsa-miR-15b	3	-5.6
Seq1	hsa-miR-139-3p	1	-5.56
Seq1	hsa-miR-620	4	-5.56
Seq1	hsa-miR-1298	6	-5.54
Seq1	hsa-miR-1321	8	-5.54
Seq1	hsa-miR-34a	5	-5.54
Seq1	hsa-miR-129-5p	2	-5.52
Seq1	hsa-miR-485-3p	1	-5.52
Seq1	hsa-miR-517c	3	-5.51
Seq1	hsa-miR-518c	7	-5.51
Seq1	hsa-miR-217	4	-5.47
Seq1	hsa-miR-668	1	-5.42
Seq1	hsa-miR-767-5p	2	-5.42
Seq1	hsa-miR-1260	1	-5.38
Seq1	hsa-miR-302f	7	-5.37
Seq1	hsa-miR-361-5p	2	-5.37
Seq1	hsa-miR-1280	3	-5.35
Seq1	hsa-miR-617	2	-5.3
Seq1	hsa-miR-645	6	-5.3
Seq1	hsa-miR-367	4	-5.27
Seq1	hsa-miR-580	6	-5.25
Seq1	hsa-miR-621	5	-5.25
Seq1	hsa-miR-1287	4	-5.24
Seq1	hsa-miR-374b	2	-5.23
Seq1	hsa-miR-21	9	-5.22
Seq1	hsa-miR-331-5p	2	-5.22
Seq1	hsa-miR-219-2-3p	2	-5.12
Seq1	hsa-miR-1281	2	-5.11
Seq1	hsa-miR-147b	2	-5.06
Seq1	hsa-miR-519d	4	-5.06
Seq1	hsa-miR-302e	9	-5.05
Seq1	hsa-miR-324-5p	2	-5.04
Seq1	hsa-miR-1825	6	-5.03
Seq1	hsa-miR-556-5p	3	-5.02
Seq1	hsa-miR-338-5p	2	-5
Seq1	hsa-miR-631	3	-4.99
Seq1	hsa-miR-96	4	-4.99
Seq1	hsa-miR-1256	3	-4.98
Seq1	hsa-miR-624	7	-4.98
Seq1	hsa-miR-196a	2	-4.95
Seq1	hsa-miR-518e	3	-4.95
Seq1	hsa-miR-224	2	-4.94
Seq1	hsa-miR-767-3p	4	-4.93
Seq1	hsa-miR-611	2	-4.9
Seq1	hsa-miR-518f	7	-4.89
Seq1	hsa-miR-1179	3	-4.88
Seq1	hsa-miR-374a	2	-4.83
Seq1	hsa-miR-1285	2	-4.82
Seq1	hsa-miR-587	4	-4.81
Seq1	hsa-miR-544	8	-4.78
Seq1	hsa-let-7i	3	-4.75
Seq1	hsa-miR-578	5	-4.75
Seq1	hsa-miR-606	6	-4.73
Seq1	hsa-miR-873	5	-4.73
Seq1	hsa-miR-30c	4	-4.7
Seq1	hsa-miR-875-3p	3	-4.68
Seq1	hsa-miR-127-5p	1	-4.66
Seq1	hsa-miR-582-3p	8	-4.66
Seq1	hsa-miR-573	6	-4.64
Seq1	hsa-miR-188-3p	1	-4.63
Seq1	hsa-miR-223	8	-4.62
Seq1	hsa-miR-890	3	-4.59
Seq1	hsa-miR-586	5	-4.51
Seq1	hsa-miR-513b	8	-4.46
Seq1	hsa-miR-187	3	-4.45
Seq1	hsa-miR-483-5p	3	-4.44
Seq1	hsa-miR-548b-3p	1	-4.41
Seq1	hsa-miR-337-5p	4	-4.39
Seq1	hsa-miR-455-5p	4	-4.39
Seq1	hsa-miR-339-5p	2	-4.37
Seq1	hsa-miR-938	3	-4.37
Seq1	hsa-miR-1302	5	-4.35
Seq1	hsa-miR-196b	2	-4.35
Seq1	hsa-miR-588	3	-4.31
Seq1	hsa-miR-200b	6	-4.29
Seq1	hsa-miR-886-3p	2	-4.28
Seq1	hsa-miR-520g	6	-4.27
Seq1	hsa-miR-1178	4	-4.25
Seq1	hsa-miR-1286	3	-4.23
Seq1	hsa-miR-496	3	-4.23
Seq1	hsa-miR-216b	5	-4.22
Seq1	hsa-miR-1206	4	-4.21
Seq1	hsa-miR-1264	9	-4.2
Seq1	hsa-miR-152	4	-4.19
Seq1	hsa-miR-125b	3	-4.18
Seq1	hsa-miR-140-5p	5	-4.14
Seq1	hsa-miR-155	4	-4.14
Seq1	hsa-miR-576-5p	4	-4.13
Seq1	hsa-miR-514	2	-4.12
Seq1	hsa-miR-129-3p	5	-4.11
Seq1	hsa-miR-194	2	-4.09
Seq1	hsa-miR-30a	4	-4.08
Seq1	hsa-miR-653	9	-4.08
Seq1	hsa-miR-513c	4	-4.06
Seq1	hsa-miR-98	3	-4.05
Seq1	hsa-miR-651	10	-4.03
Seq1	hsa-miR-16	3	-4.01
Seq1	hsa-miR-567	1	-3.84
Seq1	hsa-miR-1247	1	-3.83
Seq1	hsa-miR-342-3p	5	-3.82
Seq1	hsa-miR-376a	6	-3.69
Seq1	hsa-miR-562	7	-3.68
Seq1	hsa-let-7f	3	-3.67
Seq1	hsa-miR-876-3p	6	-3.67
Seq1	hsa-miR-935	4	-3.67
Seq1	hsa-miR-579	10	-3.64
Seq1	hsa-miR-633	4	-3.62
Seq1	hsa-miR-569	6	-3.6
Seq1	hsa-miR-592	6	-3.58
Seq1	hsa-miR-487b	2	-3.57
Seq1	hsa-miR-296-5p	1	-3.56
Seq1	hsa-miR-887	1	-3.46
Seq1	hsa-miR-518b	7	-3.45
Seq1	hsa-miR-628-5p	3	-3.44
Seq1	hsa-miR-452	6	-3.34
Seq1	hsa-miR-148a	1	-3.33
Seq1	hsa-miR-376c	4	-3.32
Seq1	hsa-miR-489	6	-3.32
Seq1	hsa-let-7e	2	-3.31
Seq1	hsa-miR-937	1	-3.27
Seq1	hsa-miR-335	1	-3.26
Seq1	hsa-miR-212	4	-3.25
Seq1	hsa-miR-338-3p	4	-3.25
Seq1	hsa-miR-34c-5p	5	-3.22
Seq1	hsa-miR-299-5p	2	-3.17
Seq1	hsa-miR-1297	4	-3.14
Seq1	hsa-miR-32	5	-3.11
Seq1	hsa-miR-512-5p	3	-3.11
Seq1	hsa-miR-561	5	-3.09
Seq1	hsa-miR-195	3	-3.06
Seq1	hsa-miR-609	2	-3.06
Seq1	hsa-miR-590-5p	6	-3.05
Seq1	hsa-miR-520h	6	-3.04
Seq1	hsa-miR-548d-3p	4	-3
Seq1	hsa-miR-30b	4	-2.99
Seq1	hsa-miR-563	3	-2.91
Seq1	hsa-miR-191	5	-2.84
Seq1	hsa-miR-34b	3	-2.82
Seq1	hsa-miR-190	4	-2.79
Seq1	hsa-miR-410	3	-2.76
Seq1	hsa-miR-190b	4	-2.72
Seq1	hsa-miR-495	1	-2.72
Seq1	hsa-miR-505	2	-2.72
Seq1	hsa-miR-449b	5	-2.7
Seq1	hsa-miR-499-3p	1	-2.6
Seq1	hsa-miR-599	4	-2.52
Seq1	hsa-miR-30d	4	-2.45
Seq1	hsa-miR-524-5p	5	-2.44
Seq1	hsa-miR-513a-3p	3	-2.43
Seq1	hsa-miR-548a-3p	2	-2.42
Seq1	hsa-miR-662	2	-2.41
Seq1	hsa-miR-1306	2	-2.31
Seq1	hsa-miR-449a	5	-2.3
Seq1	hsa-miR-369-3p	4	-2.27
Seq1	hsa-miR-1237	6	-2.26
Seq1	hsa-miR-655	5	-2.26
Seq1	hsa-miR-362-5p	2	-2.23
Seq1	hsa-miR-548p	4	-2.18
Seq1	hsa-miR-548n	3	-2.13
Seq1	hsa-miR-219-5p	4	-2.08
Seq1	hsa-miR-548c-5p	3	-2.08
Seq1	hsa-miR-649	2	-2.04
Seq1	hsa-miR-548g	4	-2.03
Seq1	hsa-miR-30e	4	-2.01
Seq1	hsa-miR-1282	1	-1.97
Seq1	hsa-miR-323-3p	4	-1.95
Seq1	hsa-miR-598	2	-1.81
Seq1	hsa-miR-1227	1	-1.8
Seq1	hsa-miR-627	1	-1.8
Seq1	hsa-miR-543	2	-1.69
Seq1	hsa-miR-1826	4	-1.62
Seq1	hsa-miR-888	4	-1.56
Seq1	hsa-miR-142-5p	3	-1.53
Seq1	hsa-miR-545	4	-1.46
Seq1	hsa-miR-548j	3	-1.45
Seq1	hsa-miR-590-3p	10	-1.43
Seq1	hsa-miR-1827	2	-1.41
Seq1	hsa-miR-553	3	-1.36
Seq1	hsa-miR-568	8	-1.33
Seq1	hsa-miR-576-3p	5	-1.31
Seq1	hsa-miR-520d-5p	5	-1.28
Seq1	hsa-miR-371-3p	2	-1.26
Seq1	hsa-miR-518a-5p	6	-1.21
Seq1	hsa-miR-527	6	-1.21
Seq1	hsa-miR-603	2	-1.21
Seq1	hsa-miR-582-5p	1	-1.2
Seq1	hsa-miR-891b	2	-1.14
Seq1	hsa-miR-141	3	-1.1
Seq1	hsa-miR-494	4	-1.07
Seq1	hsa-miR-1279	5	-1.03
Seq1	hsa-miR-802	4	-1.03
Seq1	hsa-miR-548d-5p	3	-1.01
Seq1	hsa-miR-1324	2	-0.97
Seq1	hsa-miR-218	1	-0.91
Seq1	hsa-miR-1283	4	-0.63
Seq1	hsa-miR-556-3p	1	-0.55
Seq1	hsa-miR-429	5	-0.43
Seq1	hsa-miR-150	1	-0.4
Seq1	hsa-miR-548i	3	-0.38
Seq1	hsa-miR-548a-5p	3	-0.26
Seq1	hsa-miR-944	3	-0.26
Seq1	hsa-miR-34c-3p	2	-0.23
Seq1	hsa-miR-548b-5p	3	-0.22
Seq1	hsa-miR-208b	2	-0.12
Seq1	hsa-miR-1185	2	-0.11
Seq1	hsa-miR-1249	2	-0.083
Seq1	hsa-miR-361-3p	2	0.031
Seq1	hsa-miR-384	2	0.062
Seq1	hsa-miR-768-3p	2	0.13
Seq1	hsa-miR-499-5p	3	0.14
Seq1	hsa-miR-889	1	0.15
Seq1	hsa-miR-128	4	0.16
Seq1	hsa-miR-548h	3	0.19
Seq1	hsa-miR-577	5	0.23
Seq1	hsa-miR-559	3	0.41
Seq1	hsa-miR-144	1	0.58
Seq1	hsa-miR-643	2	0.63
Seq1	hsa-miR-208a	2	0.68
Seq1	hsa-miR-200a	3	0.69
Seq1	hsa-miR-380	1	0.75
Seq1	hsa-miR-607	5	0.88
Seq1	hsa-miR-516a-5p	1	1.09
Seq1	hsa-miR-548f	4	1.13
Seq1	hsa-miR-548c-3p	2	1.15
Seq1	hsa-miR-1277	2	1.23
Seq1	hsa-miR-329	1	1.28
Seq1	hsa-miR-486-5p	1	1.5
Seq1	hsa-miR-363	2	1.57
Seq1	hsa-miR-483-3p	2	1.75
Seq1	hsa-miR-139-5p	2	1.9
Seq1	hsa-miR-656	4	1.93
Seq1	hsa-miR-197	2	2.01
Seq1	hsa-miR-1243	4	2.09
Seq1	hsa-miR-362-3p	1	2.41
Seq1	hsa-miR-137	3	3.09
Seq1	hsa-miR-451	2	3.25
Seq1	hsa-miR-548e	2	4.08
Seq1	hsa-miR-365	2	4.99
Seq1	hsa-miR-377	1	5.25
Seq1	hsa-miR-337-3p	1	5.42
Seq1	hsa-miR-885-5p	1	5.84
