# Supplementary material for: Long intergenic non-protein coding RNA 00858 functions as a competing endogenous RNA for miR-422a to facilitate the cell growth in non-small cell lung cancer
Source: publisher site journal article supplement (doi:10.18632/aging.101171), 2017-02-06
Supplement: Supplementary file 3 [file aging-v9i2-101171-supplementary-material-SD3.xlsx]

## Sheet: Sheet1
Table S3. Top 100 potential targets of miR-422a
Series	Targets
1	ELAC1
2	SEC23IP
3	VANGL1
4	PIGS
5	KIF3C
6	CNTN5
7	WDR31
8	PAFAH1B2
9	PLCXD2
10	RANBP17
11	LAMC1
12	KIAA1522
13	DHX36
14	KLK4
15	DOCK2
16	RNF19A
17	JADE3
18	VANGL1
19	NCR3LG1
20	AMMECR1L
21	ELK4
22	ALMS1
23	NUPL1
24	KIAA1958
25	WDR16
26	SSPN
27	KDSR
28	TMCO1
29	WDR31
30	INO80C
31	C17orf74
32	ITPRIPL2
33	HOOK3
34	NUDT9
35	CIR1
36	FNTA
37	PEBP1
38	SHPRH
39	NDST4
40	USP6NL
41	ESYT3
42	GNA13
43	ZNF134
44	TRPC3
45	TRPM1
46	GPN1
47	KPNA6
48	ACOXL
49	NT5E
50	VPS35
51	MTFR2
52	NAE1
53	PRR20E
54	PRR20C
55	TLK1
56	PRR20B
57	KIF26B
58	PRR20D
59	HNRNPA1
60	MSH3
61	WDR75
62	FAM219B
63	PRR23D2
64	PRR23D1
65	ZNF507
66	SNX25
67	RPN2
68	FANCA
69	DHX36
70	RFXAP
71	HERC2
72	PSMA5
73	EFNA5
74	C17orf72
75	ATG12
76	HLTF
77	PITPNA
78	TMEM106A
79	SLC25A26
80	GOLPH3L
81	ADAR
82	FOXN3
83	IL6ST
84	LCA5L
85	MNAT1
86	IGF1R
87	EIF4G3
88	EPB41L3
89	HNRNPH1
90	DEK
91	CDC42BPB
92	COMMD10
93	NCAM2
94	CHP2
95	PLK1S1
96	PTPMT1
97	MED17
98	MBD2
99	NR2C1
100	RAB39
